# Supplementary material for: Longitudinal Analysis of Change in Mammographic Density in Each Breast and Its Association With Breast Cancer Risk
Source: PubMed Central journal article supplement (PMC10141289; doi:10.1001/jamaoncol.2023.0434), 2023-04-27
Supplement: jamaoncol-e230434-s002.pdf [file jamaoncol-e230434-s002.pdf]

## Data Sharing Statement

Jiang. Longitudinal Analysis of Change in Mammographic Density in Each Breast and Its Association With Breast Cancer Risk. *JAMA Oncol.* Published April 27, 2023.

doi:10.1001/jamaoncol.2023.0434

### Data

**Data available:** Yes

**Data types:** Deidentified participant data, Data dictionary

**How to access data:** not ready yet but likely through university library system

**When available:** With publication

### Supporting Documents

**Document types:** None

### Additional Information

**Who can access the data:** anyone requesting data

**Types of analyses:** for any purpose

**Mechanisms of data availability:** through library data sharing system being implemented by WashU
